# Supplementary material
Source: Research Square preprint supplement (doi:10.21203/rs.3.rs-9035595/v1)
Supplement: Supplementary file 1 [file ba3ed9fe61b92c904c9c82dc.docx]

Supplementary materials

[Table S1 The set of disease codes utilized in the analysis 2](#_Toc222493017)

[Table S2 Distribution of missing values 3](#_Toc222493018)

[Table S3 Baseline characteristics according to 90-day mortality 4](#_Toc222493019)

[Table S4 Univariate Cox Regression Analysis of 30-Day All-Cause Mortality 6](#_Toc222493020)

[Table S5 Univariate Cox Regression Analysis of 90-Day All-Cause Mortality 8](#_Toc222493021)

[Table S6 Variance inflation factor between variables 10](#_Toc222493022)

[Table S7 After excluding missing values, the association between the CHG index and all-cause mortality 11](#_Toc222493023)

[Table S8 Logistic regression model was used to analyze the relationship between the CHG index and all-cause mortality 12](#_Toc222493024)

[Table S9 The performance comparison of each ML model in predicting 30-day mortality 13](#_Toc222493025)

[Table S10. Optimal parameter configuration for each model. 14](#_Toc222493026)

# Table S1 The set of disease codes utilized in the analysis

| Ischemic stroke | ICD9 | 43300, 43301, 43310, 43311, 43320, 43321, 43330, 43331, 43380, 43381, 43390, 43391, 43400, 43401, 43410, 43411, 43490, 43491 |
| --- | --- | --- |
| Ischemic stroke | ICD10 | I6341, I6342, I6343, I6344, I635, I6351, I6352, I6353, I6354, I65, I66, I63411, I63412, I63413, I63419, I63421, I63422, I63423, I63429, I63431, I63432, I63433, I63439, I63441, I63442, I63443, I63449,  I6350, I63511, I63512, I63513, I63519, I63521, I63522, I63523, I63529, I63531, I63532, I63533, I63539, I63541, I63542, I63543, I63549, I636, I638, I639, I6381, I6389, I6300, I6301, I6302, I6310, I6311, I6312, I6320, I6321, I6322, I6330, I6331, I6332, I6333, I6334, I6340 |
| Ischemic heart disease | ICD10 | I255, I200, I201, I208, I209, I210, I2101, I2102, I2109, I2111, I2119, I2121, I2129, I213, I214, I219, I21A1, I21A9, I220, I221, I222, I228, I229, I230, I231, I232, I233, I234, I235, I236, I237, I238, I240, I241, I248, I249, I2510, I25110, I25111, I25118, I25119, I25810, I2582, I2583, I2584 |

# Table S2 Distribution of missing values

| Variable | Non-Missing Count | Missing Count | Missing Percentage |
| --- | --- | --- | --- |
| LDL | 1903 | 56 | 2.86% |
| TG | 1941 | 18 | 0.92% |
| RBC | 1947 | 12 | 0.61% |
| WBC | 1947 | 12 | 0.61% |
| RDW | 1947 | 12 | 0.61% |
| Platelet | 1947 | 12 | 0.61% |
| Hemoglobin | 1947 | 12 | 0.61% |
| Hematocrit | 1947 | 12 | 0.61% |
| Temperature | 1949 | 10 | 0.51% |
| Weight | 1951 | 8 | 0.41% |
| RR | 1953 | 6 | 0.31% |
| Potassium | 1957 | 2 | 0.10% |
| Heart rate | 1958 | 1 | 0.05% |
| SBP | 1958 | 1 | 0.05% |
| DBP | 1958 | 1 | 0.05% |
| SPO2 | 1958 | 1 | 0.05% |
| Creatinine | 1958 | 1 | 0.05% |
| Aniongap | 1958 | 1 | 0.05% |
| Bicarbonate | 1958 | 1 | 0.05% |
| GCS | 1958 | 1 | 0.05% |
| Age | 1959 | 0 | 0% |
| Gender | 1959 | 0 | 0% |
| Race | 1959 | 0 | 0% |
| BUN | 1959 | 0 | 0% |
| Sodium | 1959 | 0 | 0% |
| TC | 1959 | 0 | 0% |
| HDL | 1959 | 0 | 0% |
| Glucose | 1959 | 0 | 0% |
| Congestive heart failure | 1959 | 0 | 0% |
| Dementia | 1959 | 0 | 0% |
| Chronic pulmonary disease | 1959 | 0 | 0% |
| Rheumatic disease | 1959 | 0 | 0% |
| Mild liver disease | 1959 | 0 | 0% |
| Diabetes | 1959 | 0 | 0% |
| Paraplegia | 1959 | 0 | 0% |
| Renal disease | 1959 | 0 | 0% |
| Hypertension | 1959 | 0 | 0% |
| Sepsis | 1959 | 0 | 0% |
| Vasopressin | 1959 | 0 | 0% |
| Aspirin | 1959 | 0 | 0% |
| Clopidogrel | 1959 | 0 | 0% |
| Warfarin | 1959 | 0 | 0% |
| Statins | 1959 | 0 | 0% |
| APS III | 1959 | 0 | 0% |

# Table S3 Baseline characteristics according to 90-day mortality

| Variable | Overall(n=1959) | Survivors(n=1547) | Non-survivors(n=412) | P value |
| --- | --- | --- | --- | --- |
| CHG index | 5.38 (5.05-5.73) | 5.37 (5.03-5.71) | 5.43 (5.14-5.84) | <0.001 |
| Demographic variables |  |  |  |  |
| Age (years) | 71.99 (61.33-82.63) | 69.68 (59.27-80.72) | 80.73 (69.73-87.89) | <0.001 |
| Male (n, %) | 1034 (52.8) | 842 (54.4) | 192 (46.6) | 0.006 |
| Race (White) | 1031 (52.6) | 843 (54.5) | 188 (45.6) | 0.002 |
| Vital signs |  |  |  |  |
| Heart rate (b/min) | 80.00 (69.00-93.00) | 79.00 (68.00-91.00) | 85.00 (72.00-98.00) | <0.001 |
| RR (b/min) | 18.00 (15.00-22.00) | 18.00 (15.00-22.00) | 19.00 (16.00-23.00) | <0.001 |
| SBP (mmHg) | 140.00 (122.00-156.00) | 140.00 (123.00-156.00) | 138.00 (118.75-155.00) | 0.074 |
| DBP (mmHg) | 77.00 (66.00-90.00) | 78.00 (67.00-90.00) | 75.00 (63.00-87.00) | <0.001 |
| Spo2 (b/min) | 98.00 (96.00-99.00) | 97.00 (96.00-99.00) | 98.00 (96.00-100.00) | 0.061 |
| Weight (kg) | 78.00 (65.50-92.70) | 79.30 (67.00-94.15) | 72.05 (60.00-86.43) | <0.001 |
| Temperature (℃) | 36.78 (36.50-37.00) | 36.78 (36.50-37.00) | 36.72 (36.44-37.06) | 0.113 |
| Clinical severity scores |  |  |  |  |
| GCS | 14.83 (13.79-15.00) | 14.86 (14.00-15.00) | 14.51 (12.52-15.00) | <0.001 |
| APS III | 35.00 (26.00-46.00) | 33.00 (25.00-43.00) | 46.00 (34.00-59.00) | <0.001 |
| Laboratory Parameters |  |  |  |  |
| BUN (mg/dL) | 17.00 (13.00-25.00) | 16.00 (12.00-22.00) | 21.00 (16.00-34.00) | <0.001 |
| Creatinine (mg/dL) | 0.90 (0.80-1.20) | 0.90 (0.70-1.20) | 1.10 (0.80-1.60) | <0.001 |
| Potassium (mEq/L) | 4.10 (3.70-4.40) | 4.00 (3.70-4.40) | 4.10 (3.80-4.60) | <0.001 |
| Sodium (mEq/L) | 139.00 (137.00-141.00) | 139.00 (137.00-141.00) | 139.00 (137.00-142.00) | 0.688 |
| Anion gap (mmol/L) | 14.00 (12.00-16.00) | 14.00 (12.00-16.00) | 15.00 (13.00-18.00) | <0.001 |
| Bicarbonate (mmol/L) | 23.00 (21.00-25.00) | 23.00 (21.00-25.00) | 22.00 (19.00-24.00) | <0.001 |
| WBC (×103/µL) | 10.00 (7.70-13.00) | 9.60 (7.60-12.50) | 11.30 (8.60-14.83) | <0.001 |
| RBC (×106/µL) | 4.17 (3.70-4.61) | 4.22 (3.76-4.63) | 3.99 (3.49-4.50) | <0.001 |
| Platelets (×103/µL) | 215.00 (171.00-266.00) | 216.00 (174.00-265.00) | 210.00 (160.00-270.00) | 0.148 |
| Hemoglobin (g/dL) | 12.50 (11.00-13.80) | 12.60 (11.20-14.00) | 11.90 (10.50-13.30) | <0.001 |
| RDW (%) | 13.70 (13.00-14.60) | 13.60 (12.90-14.50) | 14.20 (13.40-15.50) | <0.001 |
| HCT (%) | 38.10 (33.80-41.50) | 38.40 (34.30-41.60) | 36.35 (32.48-40.80) | <0.001 |
| Glucose (mg/dL) | 125.00 (103.00-162.00) | 121.00 (100.00-153.00) | 143.00 (116.00-189.25) | <0.001 |
| TG (mg/dL) | 102.00 (74.00-143.00) | 103.00 (75.00-145.00) | 95.00 (71.00-135.00) | 0.066 |
| TC (mg/dL) | 156.00 (127.00-189.00) | 160.00 (130.00-192.00) | 142.00 (116.75-174.00) | <0.001 |
| HDL (mg/dL) | 45.00 (36.00-57.00) | 46.00 (37.00-57.50) | 45.00 (35.00-55.00) | 0.008 |
| LDL (mg/dL) | 83.00 (60.00-113.00) | 87.00 (62.00-115.00) | 72.00 (53.00-101.25) | <0.001 |
| Comorbidities |  |  |  |  |
| Sepsis (%) | 607 (31.0) | 386 (25.0) | 221 (53.6) | <0.001 |
| Congestive heart failure (%) | 625 (31.9) | 445 (28.8) | 180 (43.7) | <0.001 |
| Dementia (%) | 110 (5.6) | 65 (4.2) | 45 (10.9) | <0.001 |
| Chronic pulmonary disease (%) | 327 (16.7) | 249 (16.1) | 78 (18.9) | 0.194 |
| Rheumatic disease (%) | 48 (2.5) | 37 (2.4) | 11 (2.7) | 0.885 |
| Diabetes (%) | 659 (33.6) | 498 (32.2) | 161 (39.1) | 0.01 |
| Renal disease (%) | 380 (19.4) | 259 (16.7) | 121 (29.4) | <0.001 |
| Mild liver disease (%) | 48 (2.5) | 36 (2.3) | 12 (2.9) | 0.614 |
| Paraplegia (%) | 961 (49.1) | 722 (46.7) | 239 (58.0) | <0.001 |
| Hypertension (%) | 1525 (77.8) | 1182 (76.4) | 343 (83.3) | 0.004 |
| Medications |  |  |  |  |
| Vasopressin (%) | 55 (2.8) | 15 (1.0) | 40 (9.7) | <0.001 |
| Aspirin (%) | 1314 (67.1) | 1054 (68.1) | 260 (63.1) | 0.062 |
| Clopidogrel (%) | 357 (18.2) | 299 (19.3) | 58 (14.1) | 0.017 |
| Warfarin (%) | 190 (9.7) | 170 (11.0) | 20 (4.9) | <0.001 |
| Statins (%) | 1339 (68.4) | 1104 (71.4) | 235 (57.0) | <0.001 |

Data are expressed as median (IQR), or n (%). CHG index: Cholesterol, high-density lipoprotein, and glucose index; RR: respiratory rate; SBP: systolic blood pressure; DBP: diastolic blood pressure; Spo2: peripheral oxygen saturation; GCS: Glasgow Coma Score; APS III: Acute Physiology Score III; BUN: blood urea nitrogen; WBC: white blood cell; RBC: red blood cell; RDW: red blood cell distribution width; HCT: hematocrit; TG: triglyceride; TC: total cholesterol; HDL: high-density lipoprotein cholesterol; LDL: low-density lipoprotein cholesterol

# Table S4 Univariate Cox Regression Analysis of 30-Day All-Cause Mortality

| Variable | HR | 95% CI Lower | 95% CI Upper | P value |
| --- | --- | --- | --- | --- |
| Age | 1.043 | 1.034 | 1.052 | <0.001 |
| Heart rate | 1.014 | 1.008 | 1.019 | <0.001 |
| SBP | 0.996 | 0.991 | 1 | 0.0545 |
| DBP | 0.989 | 0.983 | 0.995 | <0.001 |
| RR | 1.03 | 1.01 | 1.05 | 0.0031 |
| SPO2 | 1.003 | 0.967 | 1.04 | 0.8741 |
| Weight | 0.987 | 0.982 | 0.992 | <0.001 |
| Temperature | 0.881 | 0.71 | 1.092 | 0.2466 |
| BUN | 1.019 | 1.015 | 1.023 | <0.001 |
| Creatinine | 1.12 | 1.056 | 1.187 | <0.001 |
| Potassium | 1.314 | 1.156 | 1.493 | <0.001 |
| Sodium | 1.017 | 0.99 | 1.045 | 0.2217 |
| Aniongap | 1.104 | 1.075 | 1.135 | <0.001 |
| Bicarbonate | 0.908 | 0.883 | 0.935 | <0.001 |
| WBC | 1.078 | 1.063 | 1.094 | <0.001 |
| RBC | 0.723 | 0.621 | 0.842 | <0.001 |
| Platelet | 0.999 | 0.998 | 1 | 0.1926 |
| Hemoglobin | 0.887 | 0.844 | 0.932 | <0.001 |
| RDW | 1.153 | 1.106 | 1.202 | <0.001 |
| Hematocrit | 0.969 | 0.952 | 0.986 | <0.001 |
| Glucose | 1.004 | 1.003 | 1.005 | <0.001 |
| TG | 1 | 1 | 1.001 | 0.4184 |
| TC | 0.994 | 0.991 | 0.996 | <0.001 |
| HDL | 0.992 | 0.986 | 0.999 | 0.0278 |
| LDL | 0.993 | 0.99 | 0.996 | <0.001 |
| GCS | 0.821 | 0.778 | 0.866 | <0.001 |
| APS III | 1.041 | 1.036 | 1.046 | <0.001 |
| Gender | 0.756 | 0.607 | 0.94 | 0.0119 |
| Race | 0.746 | 0.6 | 0.928 | 0.0086 |
| Sepsis | 3.188 | 2.559 | 3.972 | <0.001 |
| Congestive heart failure | 1.698 | 1.363 | 2.115 | <0.001 |
| Dementia | 2.292 | 1.619 | 3.245 | <0.001 |
| Chronic pulmonary disease | 1.21 | 0.919 | 1.595 | 0.1743 |
| Rheumatic disease | 1.137 | 0.585 | 2.212 | 0.7035 |
| Diabetes | 1.262 | 1.009 | 1.578 | 0.0415 |
| Renal disease | 1.663 | 1.304 | 2.12 | <0.001 |
| Mild liver disease | 0.979 | 0.484 | 1.98 | 0.9532 |
| Paraplegia | 1.509 | 1.21 | 1.882 | <0.001 |
| Hypertension | 1.4 | 1.049 | 1.869 | 0.0225 |
| Vasopressin | 7.356 | 5.252 | 10.303 | <0.001 |
| Aspirin | 0.688 | 0.552 | 0.859 | 0.001 |
| Clopidogrel | 0.703 | 0.514 | 0.961 | 0.0274 |
| Warfarin | 0.356 | 0.204 | 0.621 | <0.001 |
| Statins | 0.482 | 0.388 | 0.6 | <0.001 |
| CHG index | 1.618 | 1.331 | 1.966 | <0.001 |
| CHG quintile |  |  |  |  |
| Q2 | 1.549 | 1.061 | 2.26 | 0.0235 |
| Q3 | 1.367 | 0.927 | 2.015 | 0.1139 |
| Q4 | 1.515 | 1.036 | 2.216 | 0.0324 |
| Q5 | 2.13 | 1.485 | 3.055 | <0.001 |

# Table S5 Univariate Cox Regression Analysis of 90-Day All-Cause Mortality

| Variable | HR | 95% CI Lower | 95% CI Upper | P value |
| --- | --- | --- | --- | --- |
| Age | 1.045 | 1.037 | 1.054 | <0.001 |
| Heart rate | 1.014 | 1.009 | 1.019 | <0.001 |
| SBP | 0.996 | 0.992 | 1 | 0.0723 |
| DBP | 0.991 | 0.986 | 0.997 | 0.0019 |
| RR | 1.032 | 1.014 | 1.05 | <0.001 |
| SPO2 | 0.998 | 0.967 | 1.03 | 0.9087 |
| Weight | 0.986 | 0.981 | 0.991 | <0.001 |
| Temperature | 0.922 | 0.759 | 1.119 | 0.4102 |
| BUN | 1.019 | 1.015 | 1.023 | <0.001 |
| Creatinine | 1.117 | 1.06 | 1.178 | <0.001 |
| Potassium | 1.258 | 1.116 | 1.417 | <0.001 |
| Sodium | 1.013 | 0.989 | 1.038 | 0.2793 |
| Aniongap | 1.094 | 1.067 | 1.121 | <0.001 |
| Bicarbonate | 0.918 | 0.895 | 0.943 | <0.001 |
| WBC | 1.065 | 1.05 | 1.081 | <0.001 |
| RBC | 0.731 | 0.638 | 0.837 | <0.001 |
| Platelet | 0.999 | 0.998 | 1 | 0.1161 |
| Hemoglobin | 0.889 | 0.85 | 0.929 | <0.001 |
| RDW | 1.152 | 1.11 | 1.197 | <0.001 |
| Hematocrit | 0.97 | 0.955 | 0.986 | <0.001 |
| Glucose | 1.004 | 1.003 | 1.005 | <0.001 |
| TG | 1 | 1 | 1.001 | 0.4791 |
| TC | 0.994 | 0.992 | 0.996 | <0.001 |
| HDL | 0.992 | 0.986 | 0.998 | 0.0091 |
| LDL | 0.994 | 0.991 | 0.996 | <0.001 |
| GCS | 0.813 | 0.776 | 0.853 | <0.001 |
| APS III | 1.039 | 1.034 | 1.043 | <0.001 |
| Gender | 0.755 | 0.622 | 0.917 | 0.0046 |
| Race | 0.733 | 0.603 | 0.89 | 0.0018 |
| Sepsis | 2.914 | 2.399 | 3.54 | <0.001 |
| Congestive heart failure | 1.75 | 1.44 | 2.128 | <0.001 |
| Dementia | 2.342 | 1.717 | 3.195 | <0.001 |
| Chronic pulmonary disease | 1.192 | 0.931 | 1.527 | 0.1624 |
| Rheumatic disease | 1.105 | 0.606 | 2.015 | 0.7435 |
| Diabetes | 1.299 | 1.065 | 1.585 | 0.0099 |
| Renal disease | 1.828 | 1.478 | 2.261 | <0.001 |
| Mild liver disease | 1.178 | 0.662 | 2.096 | 0.576 |
| Paraplegia | 1.501 | 1.234 | 1.827 | <0.001 |
| Hypertension | 1.452 | 1.12 | 1.882 | 0.005 |
| Vasopressin | 6.48 | 4.665 | 9.002 | <0.001 |
| Aspirin | 0.796 | 0.651 | 0.972 | 0.0256 |
| Clopidogrel | 0.7 | 0.53 | 0.925 | 0.0122 |
| Warfarin | 0.433 | 0.276 | 0.68 | <0.001 |
| Statins | 0.551 | 0.453 | 0.671 | <0.001 |
| CHG index | 1.531 | 1.285 | 1.825 | <0.001 |
| CHG quintile |  |  |  |  |
| Q2 | 1.49 | 1.068 | 2.078 | 0.0192 |
| Q3 | 1.381 | 0.985 | 1.937 | 0.0612 |
| Q4 | 1.481 | 1.061 | 2.069 | 0.0212 |
| Q5 | 1.959 | 1.423 | 2.698 | <0.001 |

# Table S6 Variance inflation factor between variables

| Variable | Before adjustment VIF | After adjustment VIF |
| --- | --- | --- |
| TC | 25.51999 | - |
| Hematocrit | 23.52867 | - |
| Hemoglobin | 21.72697 | - |
| LDL | 16.685 | 1.632578 |
| CHG index | 12.21781 | 1.832613 |
| HDL | 7.905767 | - |
| RBC | 6.990075 | 1.536185 |
| Glucose | 6.548835 | - |
| BUN | 2.259076 | 2.247702 |
| APS III | 2.149825 | 2.127424 |
| Creatinine | 2.023638 | 2.011565 |
| Anion gap | 1.6214 | 1.555164 |
| Age | 1.615217 | 1.56841 |
| RDW | 1.612727 | 1.166202 |
| Renal disease | 1.543674 | 1.5364 |
| GCS | 1.522623 | 1.510182 |
| Gender | 1.501668 | 1.325802 |
| Diabetes | 1.430978 | 1.348135 |
| Bicarbonate | 1.425103 | 1.408828 |
| Weight | 1.415358 | 1.368701 |
| WBC | 1.369294 | 1.357453 |
| Heart rate | 1.32046 | 1.307781 |
| Sepsis | 1.288368 | 1.285033 |
| Congestive heart failure | 1.256639 | 1.237647 |
| DBP | 1.217025 | 1.204187 |
| Statins | 1.214823 | 1.212705 |
| Potassium | 1.192972 | 1.154355 |
| Paraplegia | 1.188843 | 1.185103 |
| Hypertension | 1.178297 | 1.175182 |
| Aspirin | 1.177565 | 1.174684 |
| Vasopressin | 1.164445 | 1.160326 |
| RR | 1.157645 | 1.154222 |
| Clopidogrel | 1.099269 | 1.092849 |
| Dementia | 1.098847 | 1.090414 |
| Race | 1.085547 | 1.063593 |
| Warfarin | 1.038431 | 1.034575 |

# Table S7 After excluding missing values, the association between the CHG index and all-cause mortality

| **Variables** | **Model 1** | | **Model 2** | | **Model 3** | | |
| --- | --- | --- | --- | --- | --- | --- | --- |
| **HR (95%CI)** | **P** | **HR (95%CI)** | **P** | | **HR (95%CI)** | **P** | |
| 30-day mortality |  |  |  |  | |  |  | |
| CHG (per 1 unit) | 1.57 (1.28-1.92) | <0.001 | 2.20 (1.76-2.73) | <0.001 | | 1.46 (1.11-1.92) | 0.007 | |
| Quintile groups |  |  |  |  | |  |  | |
| Group 1 | 1.00 (Reference) |  | 1.00 (Reference) |  | | 1.00 (Reference) |  | |
| Group 2 | 1.50 (1.02-2.22) | 0.039 | 1.59 (1.08-2.34) | 0.019 | | 1.70 (1.14-2.54) | 0.009 | |
| Group 3 | 1.30 (0.88-1.94) | 0.191 | 1.48 (0.99-2.21) | 0.055 | | 1.45 (0.96-2.20) | 0.077 | |
| Group 4 | 1.54 (1.05-2.27) | 0.028 | 1.96 (1.33-2.90) | <0.001 | | 1.66 (1.08-2.55) | 0.02 | |
| Group 5 | 1.96 (1.35-2.84) | <0.001 | 2.95 (2.01-4.32) | <0.001 | | 1.82 (1.15-2.90) | 0.011 | |
| P for trend | 1.55 (1.20-2.00) | <0.001 | 2.17 (1.66-2.82) | <0.001 | | 1.45 (1.04-2.01) | 0.029 | |
| 90-day mortality |  |  |  |  | |  |  | |
| CHG (per 1 unit) | 1.48 (1.23-1.78) | <0.001 | 2.10 (1.72-2.55) | <0.001 | | 1.47 (1.15-1.87) | 0.002 | |
| Quintile groups |  |  |  |  | |  |  | |
| Group 1 | 1.00 (Reference) |  | 1.00 (Reference) |  | | 1.00 (Reference) |  | |
| Group 2 | 1.51 (1.07-2.12) | 0.019 | 1.61 (1.14-2.27) | 0.007 | | 1.74 (1.22-2.47) | 0.002 | |
| Group 3 | 1.36 (0.96-1.93) | 0.083 | 1.56 (1.10-2.22) | 0.013 | | 1.55 (1.08-2.23) | 0.018 | |
| Group 4 | 1.54 (1.09-2.16) | 0.014 | 1.99 (1.41-2.81) | <0.001 | | 1.72 (1.17-2.51) | 0.005 | |
| Group 5 | 1.84 (1.32-2.57) | <0.001 | 2.83 (2.01-3.99) | <0.001 | | 1.82 (1.21-2.75) | 0.004 | |
| P for trend | 1.47 (1.17-1.84) | <0.001 | 2.09 (1.65-2.64) | <0.001 | | 1.44 (1.08-1.94) | 0.014 | |

HR: Hazard Ratio, CI: Confidence Interval

Model 1: unadjusted;

Model 2: adjusted for age, gender, race.

Model 3: adjusted for Model 2 plus Sepsis, Congestive heart failure, dementia, diabetes, renal disease, paraplegia, hypertension, heart rate, DBP, RR, weight, BUN, creatinine, potassium, anion gap, bicarbonate, WBC, RBC, RDW, LDL, vasopressin, aspirin, clopidogrel, warfarin, statins, GCS, APS III

# Table S8 Logistic regression model was used to analyze the relationship between the CHG index and all-cause mortality

| **Variables** | **Model 1** | | **Model 2** | | **Model 3** | | |
| --- | --- | --- | --- | --- | --- | --- | --- |
| **OR (95%CI)** | **P** | **OR (95%CI)** | **P** | | **OR (95%CI)** | **P** | |
| 30-day mortality |  |  |  |  | |  |  | |
| CHG (per 1 unit) | 1.66 (1.33-2.06) | <0.001 | 2.38 (1.87-3.04) | <0.001 | | 1.74 (1.24-2.46) | 0.002 | |
| Quintile groups |  |  |  |  | |  |  | |
| Group 1 | 1.00 (Reference) |  | 1.00 (Reference) |  | | 1.00 (Reference) |  | |
| Group 2 | 1.62 (1.08-2.43) | 0.02 | 1.69 (1.11-2.56) | 0.014 | | 1.98 (1.23-3.18) | 0.005 | |
| Group 3 | 1.39 (0.92-2.11) | 0.117 | 1.61 (1.05-2.46) | 0.03 | | 1.90 (1.15-3.13) | 0.012 | |
| Group 4 | 1.57 (1.04-2.36) | 0.031 | 2.02 (1.32-3.10) | 0.001 | | 1.88 (1.12-3.17) | 0.017 | |
| Group 5 | 2.23 (1.51-3.30) | <0.001 | 3.49 (2.30-5.29) | <0.001 | | 2.27 (1.29-4.02) | 0.005 | |
| P for trend | 1.67 (1.28-2.18) | <0.001 | 2.41 (1.80-3.22) | <0.001 | | 1.66 (1.10-2.50) | 0.016 | |
| 90-day mortality |  |  |  |  | |  |  | |
| CHG (per 1 unit) | 1.57 (1.29-1.92) | <0.001 | 2.32 (1.85-2.92) | <0.001 | | 1.92 (1.40-2.64) | <0.001 | |
| Quintile groups |  |  |  |  | |  |  | |
| Group 1 | 1.00 (Reference) |  | 1.00 (Reference) |  | | 1.00 (Reference) |  | |
| Group 2 | 1.56 (1.08-2.26) | 0.017 | 1.64 (1.12-2.41) | 0.011 | | 1.96 (1.28-3.00) | 0.002 | |
| Group 3 | 1.42 (0.98-2.06) | 0.062 | 1.67 (1.13-2.46) | 0.009 | | 2.08 (1.33-3.26) | 0.001 | |
| Group 4 | 1.54 (1.07-2.23) | 0.02 | 2.05 (1.39-3.03) | <0.001 | | 2.10 (1.31-3.36) | 0.002 | |
| Group 5 | 2.06 (1.45-2.95) | <0.001 | 3.37 (2.29-4.95) | <0.001 | | 2.54 (1.51-4.25) | <0.001 | |
| P for trend | 1.58 (1.24-2.02) | <0.001 | 2.36 (1.80-3.10) | <0.001 | | 1.85 (1.27-2.69) | 0.001 | |

OR: Odds Ratio, CI: Confidence Interval

Model 1: unadjusted;

Model 2: adjusted for age, gender, race.

Model 3: adjusted for Model 2 plus Sepsis, Congestive heart failure, dementia, diabetes, renal disease, paraplegia, hypertension, heart rate, DBP, RR, weight, BUN, creatinine, potassium, anion gap, bicarbonate, WBC, RBC, RDW, LDL, vasopressin, aspirin, clopidogrel, warfarin, statins, GCS, APS III

# Table S9 The performance comparison of each ML model in predicting 30-day mortality

| Algorithm | Data set | Threshold | AUC (95%CI) | Sensitivity | Specificity | Accuracy | F1 score |
| --- | --- | --- | --- | --- | --- | --- | --- |
| Stacking Classifier | Train | 0.3 | 0.882 (0.866, 0.898) | 0.546 | 0.917 | 0.855 | 0.558 |
| Test | 0.3 | 0.833 (0.796, 0.870) | 0.523 | 0.911 | 0.847 | 0.531 |
| LR | Train | 0.3 | 0.831 (0.813, 0.850) | 0.897 | 0.559 | 0.616 | 0.438 |
| Test | 0.3 | 0.833 (0.796, 0.870) | 0.877 | 0.554 | 0.607 | 0.425 |
| RF | Train | 0.3 | 0.912 (0.898, 0.926) | 0.977 | 0.549 | 0.621 | 0.463 |
| Test | 0.3 | 0.821 (0.783, 0.859) | 0.908 | 0.502 | 0.569 | 0.411 |
| XGBoost | Train | 0.3 | 0.820 (0.801, 0.839) | 0.985 | 0.189 | 0.322 | 0.327 |
| Test | 0.3 | 0.803 (0.764, 0.842) | 0.954 | 0.18 | 0.309 | 0.314 |
| LightGBM | Train | 0.3 | 0.850 (0.832, 0.868) | 0.954 | 0.484 | 0.562 | 0.422 |
| Test | 0.3 | 0.813 (0.774, 0.851) | 0.908 | 0.446 | 0.523 | 0.387 |
| LDA | Train | 0.3 | 0.832 (0.813, 0.850) | 0.893 | 0.566 | 0.62 | 0.44 |
| Test | 0.3 | 0.836 (0.799, 0.872) | 0.862 | 0.557 | 0.607 | 0.421 |
| GB | Train | 0.3 | 0.907 (0.893, 0.921) | 0.863 | 0.792 | 0.804 | 0.596 |
| Test | 0.3 | 0.795 (0.755, 0.835) | 0.708 | 0.749 | 0.742 | 0.477 |
| AdaBoost | Train | 0.3 | 0.882 (0.866, 0.898) | 1 | 0.218 | 0.349 | 0.339 |
| Test | 0.3 | 0.833 (0.796, 0.870) | 0.969 | 0.214 | 0.339 | 0.327 |
| NB | Train | 0.3 | 0.832 (0.813, 0.850) | 0.737 | 0.753 | 0.75 | 0.497 |
| Test | 0.3 | 0.831 (0.794, 0.868) | 0.723 | 0.765 | 0.758 | 0.497 |
| QDA | Train | 0.3 | 0.860 (0.843, 0.877) | 0.817 | 0.746 | 0.757 | 0.53 |
| Test | 0.3 | 0.805 (0.766, 0.844) | 0.631 | 0.749 | 0.73 | 0.436 |

LR, logistic regression; RF, random forest, XGBoost, extreme gradient boosting; LightGBM, light gradient boosting machine; LDA: linear discriminant analysis; GB: gradient boosting; AdaBoost: adaptive boosting; NB: naive bayes; QDA: quadratic discriminant analysis

# Table S10. Optimal parameter configuration for each model.

| Model Name | Parameter Name | Parameter Value |
| --- | --- | --- |
| LR | C | 0.2955 |
| penalty | elasticnet |
| solver | saga |
| l1_ratio | 0 |
| class_weight | None |
| RF | n_estimators | 200 |
| max_depth | 8 |
| min_samples_split | 50 |
| min_samples_leaf | 20 |
| max_features | log2 |
| class_weight | None |
| max_samples | 0.8 |
| bootstrap | TRUE |
| GB | n_estimators | 40 |
| max_depth | 3 |
| learning_rate | 0.8 |
| subsample | 0.4936 |
| min_samples_split | 200 |
| min_samples_leaf | 100 |
| max_features | sqrt |
| XGBoost | n_estimators | 100 |
| max_depth | 3 |
| learning_rate | 0.4554 |
| subsample | 0.659 |
| colsample_bytree | 0.7 |
| colsample_bylevel | 0.6629 |
| reg_alpha | 50 |
| reg_lambda | 50 |
| gamma | 5 |
| min_child_weight | 59 |
| scale_pos_weight | 1.5 |
| LightGBM | n_estimators | 100 |
| max_depth | 4 |
| learning_rate | 0.1 |
| subsample | 0.4 |
| colsample_bytree | 0.5566 |
| num_leaves | 10 |
| min_child_samples | 100 |
| min_child_weight | 5 |
| reg_alpha | 50 |
| reg_lambda | 50 |
| class_weight | None |
| AdaBoost | n_estimators | 600 |
| learning_rate | 0.1557 |
| algorithm | SAMME |
| NB | var_smoothing | 0.000038 |
| LDA | solver | lsqr |
| shrinkage | 0 |
| tol | 0.01 |
| QDA | reg_param | 0 |
| tol | 0 |

LR, logistic regression; RF, random forest, XGBoost, extreme gradient boosting; LightGBM, light gradient boosting machine; LDA: linear discriminant analysis; GB: gradient boosting; AdaBoost: adaptive boosting; NB: naive bayes; QDA: quadratic discriminant analysis
